# Supplementary material for: Growth condition effects on the structure evolution and electrical properties of low-melting-point bismuth films
Source: Royal Society of Chemistry journal article supplement (doi:10.1039/d2ce00028h), 2022-01-01
Supplement: d2ce00028h1.pdf [file d2ce00028h1.pdf]

Supplementary information

**Growth condition effect on the structure evolution and electrical property in low-melting bismuth films**

Nan Wang <sup>a,\*</sup>, Jun Zhang <sup>a</sup>, Yang Qi <sup>b,\*</sup>

<sup>a</sup> Key Laboratory of Research and Application of Multiple Hard Films, College of Mechanical Engineering, Shenyang University, Shenyang, 110044, P R China

<sup>b</sup> Department of Materials Physics and Chemistry, School of Materials Science and Engineering & State Key Laboratory of Rolling and Automation, Northeastern University, Shenyang, 110819, P R China

\*Corresponding Author. Email: [wangnan0602@163.com](mailto:wangnan0602@163.com); [qiyang@imp.neu.edu.cn](mailto:qiyang@imp.neu.edu.cn)

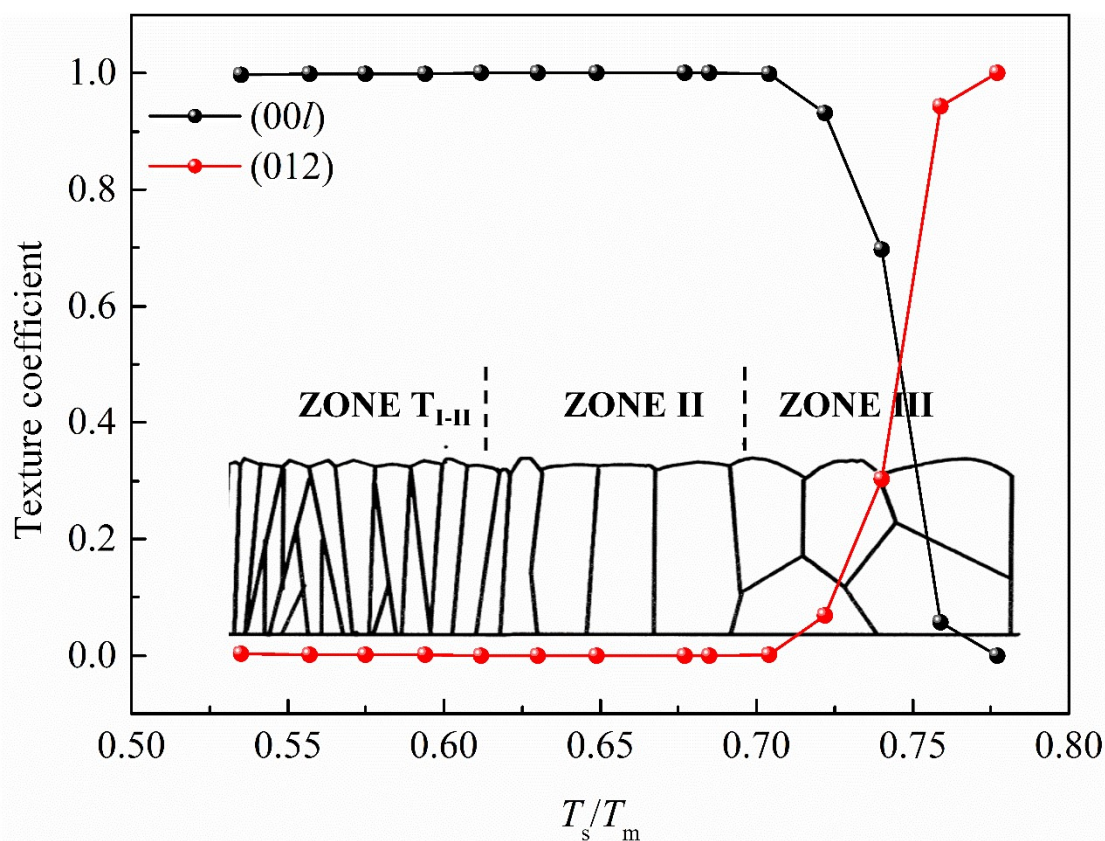

**Fig. S1.** Basic structure zone models of thin films with different  $T_s/T_m$ .

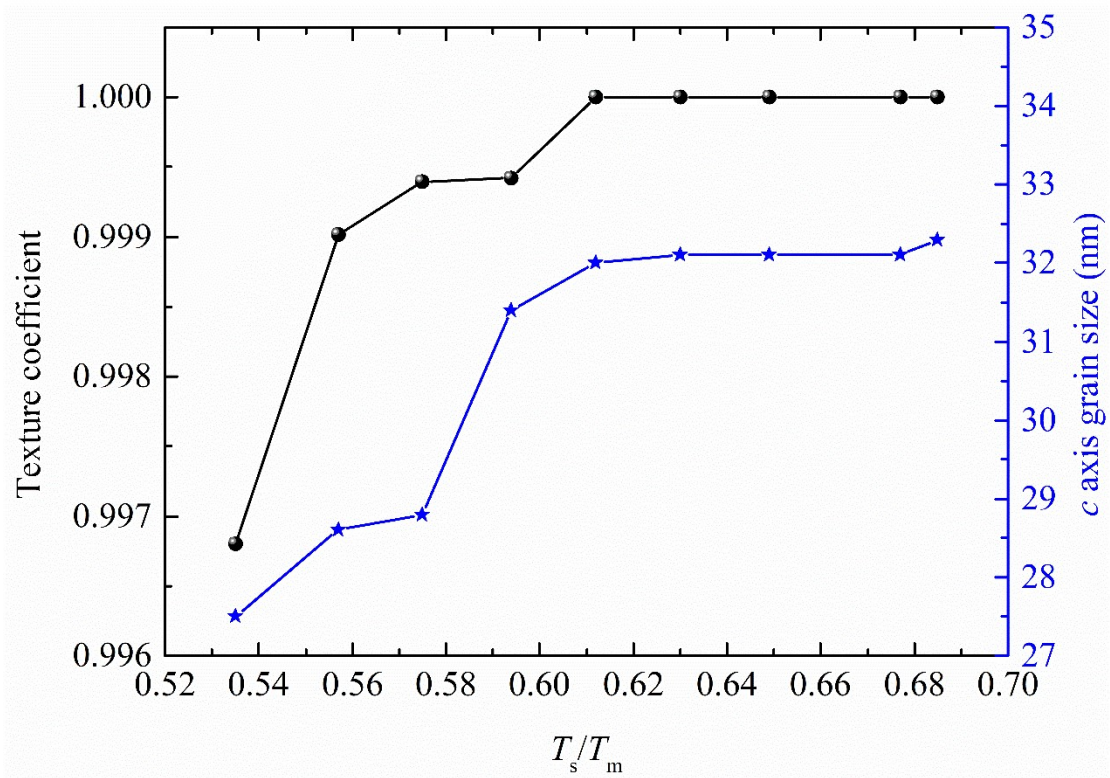

**Fig. S2.** The texture coefficient and out-of-plane grain size of Bi thin films at different substrate temperatures.

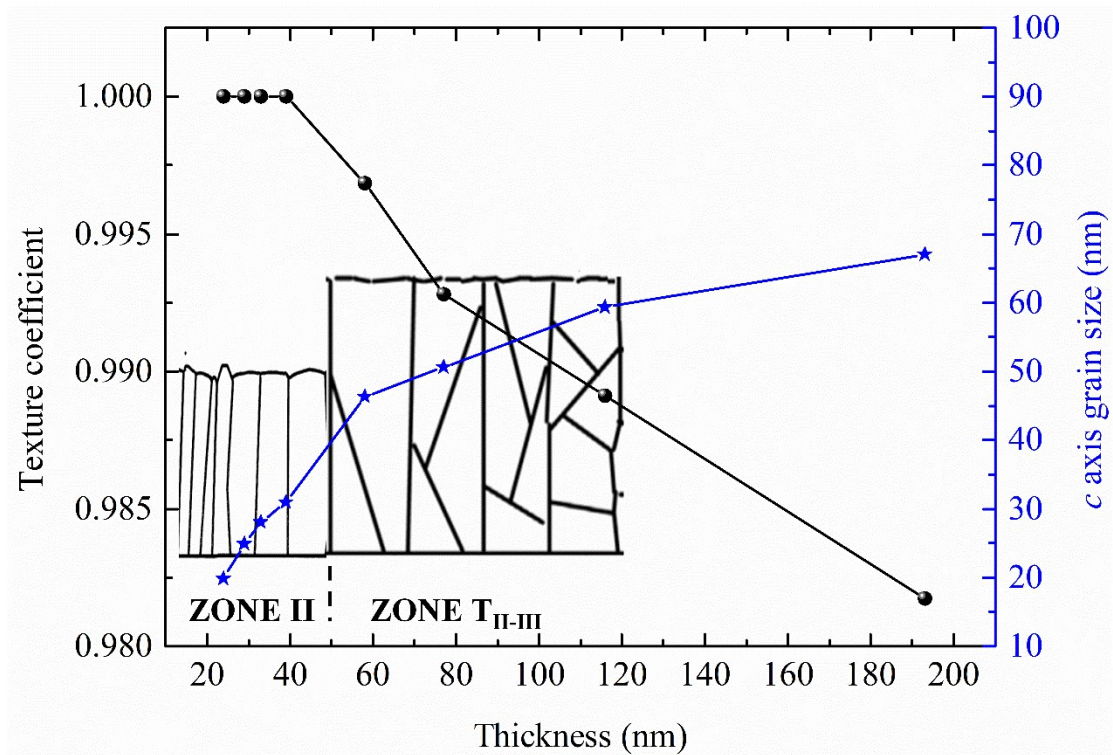

**Fig. S3.** Basic structure zone models of thin films with different thicknesses.

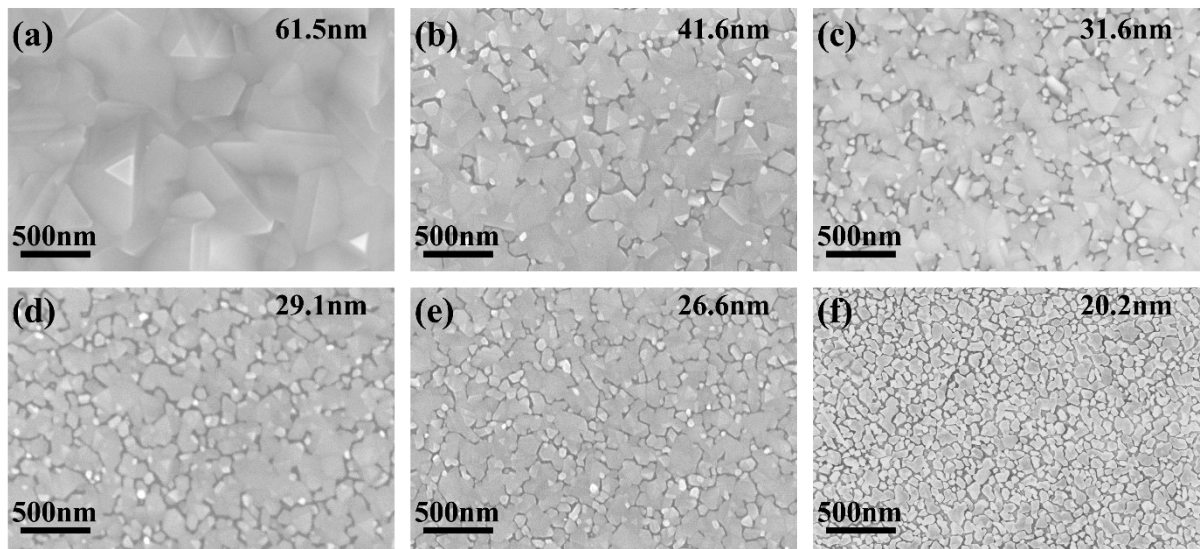

**Fig. S4.** FESEM images of Bi thin films with different thicknesses at a growth rate of 0.14 Å/min. (a) 61.5 nm; (b) 41.6 nm; (c) 31.6 nm; (d) 29.1 nm; (e) 26.6 nm; (f) 20.2 nm.

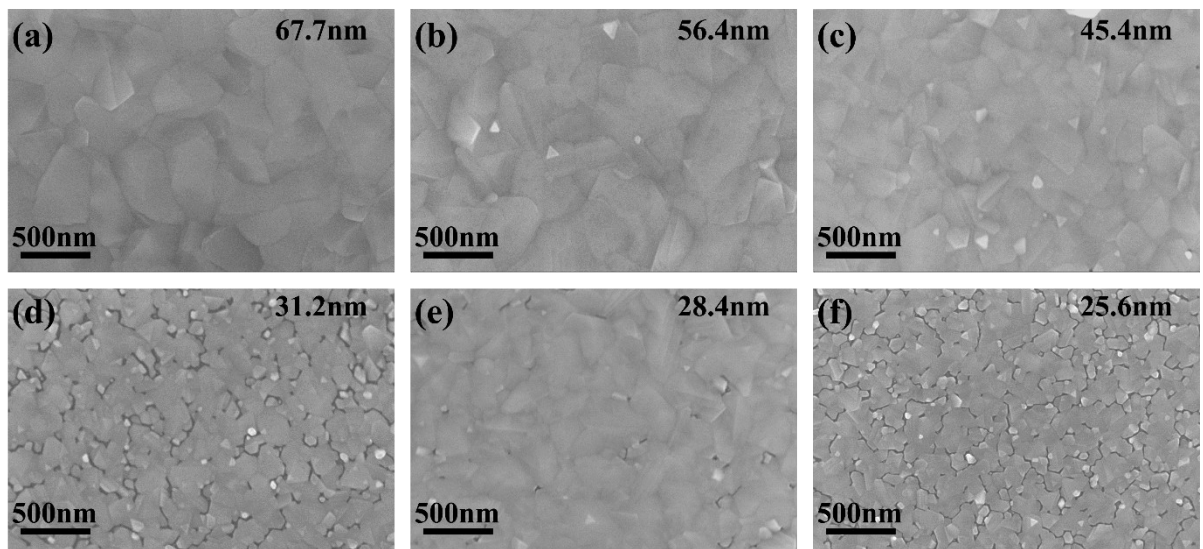

**Fig. S5.** FESEM images of Bi thin films with different thicknesses at a growth rate of 0.47 Å/min. (a) 67.7 nm; (b) 56.4 nm; (c) 45.4 nm; (d) 31.2 nm; (e) 28.4 nm; (f) 25.6 nm.

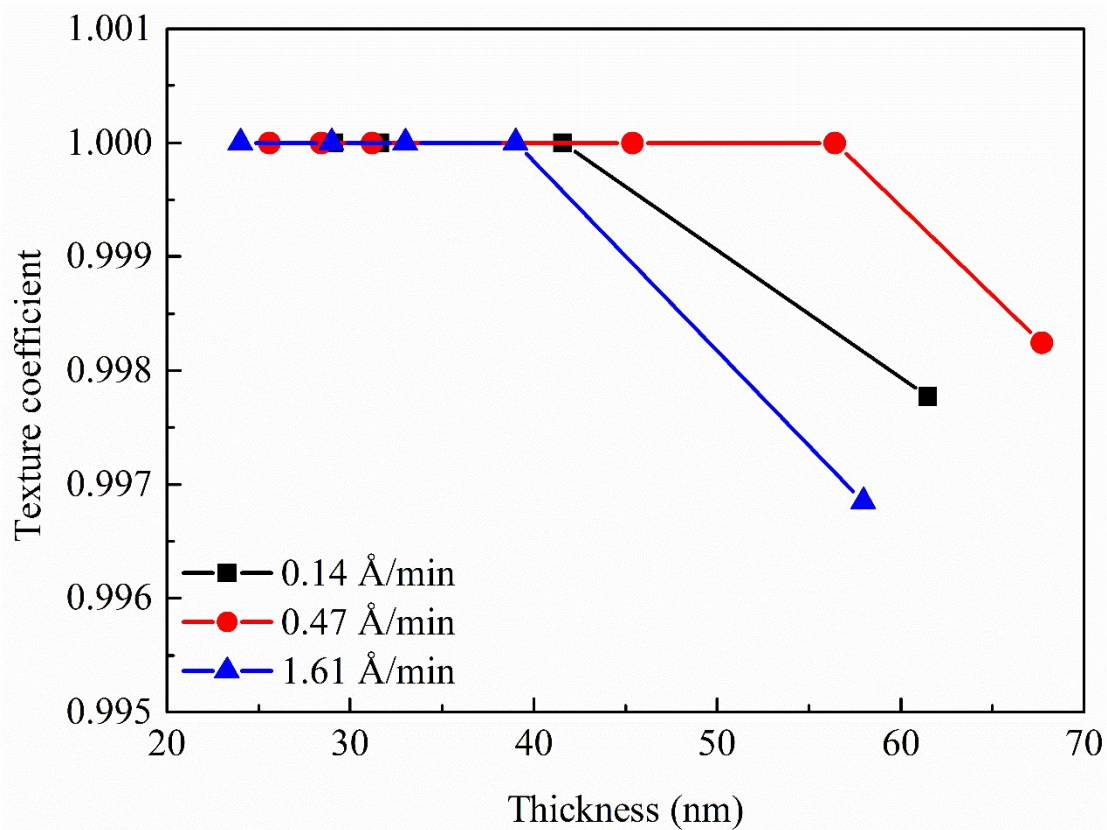

**Fig. S6.** The texture coefficient of Bi thin films at different growth rate.

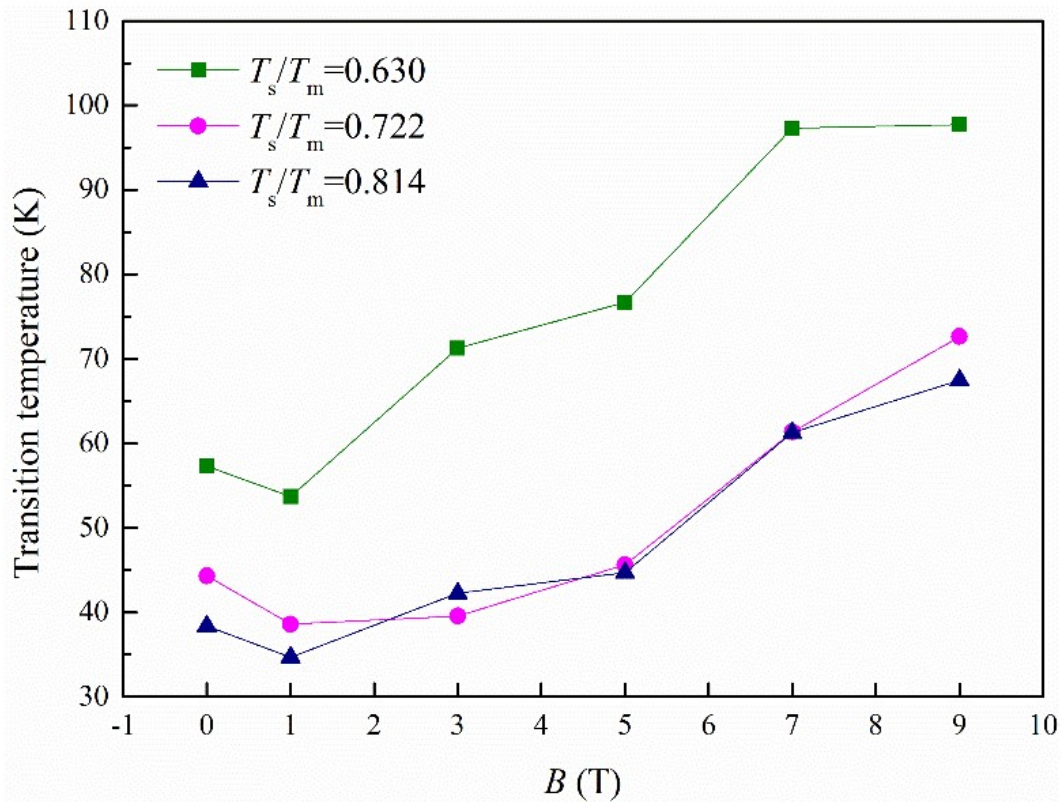

**Fig. S7.** Metal-insulator transition temperature curves under the fixed magnetic field.

Table 1 Sample parameters

| Film | $T_s$<br>(K) | $T_m$<br>(K) | $T_s/T_m$ | Deposition<br>time<br>(min) | Growth<br>rate<br>(Å/min) | Thickness<br>(nm) | Out-plane<br>grain size<br>(nm) | Root mean<br>square surface<br>roughness* (nm) |
|------|--------------|--------------|-----------|-----------------------------|---------------------------|-------------------|---------------------------------|------------------------------------------------|
| 1    | 291.15       | 544.45       | 0.535     | 180                         | -                         | ~35               | 27.5                            | ~12.2                                          |
| 2    | 343.15       | 544.45       | 0.630     | 180                         | -                         | ~35               | 32.1                            | ~4.2                                           |
| 3    | 373.15       | 544.45       | 0.685     | 180                         | -                         | ~35               | 32.3                            | ~2.1                                           |
| 4    | 383.15       | 544.45       | 0.704     | 180                         | -                         | ~35               | 28.9                            | ~11.9                                          |
| 5    | 393.15       | 544.45       | 0.722     | 180                         | -                         | ~35               | 29.0                            | ~7.4                                           |
| 6    | 423.15       | 544.45       | 0.777     | 180                         | -                         | ~35               | 35.4                            | ~8.2                                           |
| 7    | 343.15       | 544.45       | 0.630     | 170                         | ~1.61                     | 29                | 24.9                            | ~2.5                                           |
| 8    | 343.15       | 544.45       | 0.630     | 210                         | ~1.61                     | 33                | 28.1                            | ~7.9                                           |
| 9    | 343.15       | 544.45       | 0.630     | 240                         | ~1.61                     | 39                | 30.9                            | ~6.5                                           |
| 10   | 343.15       | 544.45       | 0.630     | 360                         | ~1.61                     | 58                | 46.4                            | ~10.5                                          |
| 11   | 343.15       | 544.45       | 0.630     | 480                         | ~1.61                     | 77                | 50.6                            | ~12.5                                          |
| 12   | 343.15       | 544.45       | 0.630     | 1200                        | ~1.61                     | 193               | 67.1                            | ~10.5                                          |
| 13   | 343.15       | 544.45       | 0.630     | 4320                        | ~0.14                     | 61.5              | 45.5                            | ~8.4                                           |
| 14   | 343.15       | 544.45       | 0.630     | 2880                        | ~0.14                     | 41.6              | 33.4                            | ~3.2                                           |
| 15   | 343.15       | 544.45       | 0.630     | 2160                        | ~0.14                     | 31.6              | 35.5                            | ~5.1                                           |
| 16   | 343.15       | 544.45       | 0.630     | 1980                        | ~0.14                     | 29.1              | 25.3                            | ~5.4                                           |
| 17   | 343.15       | 544.45       | 0.630     | 1880                        | ~0.14                     | 26.6              | 31.5                            | ~7.7                                           |
| 18   | 343.15       | 544.45       | 0.630     | 1440                        | ~0.14                     | 20.2              | 27.5                            | ~5.2                                           |
| 19   | 343.15       | 544.45       | 0.630     | 1440                        | ~0.47                     | 67.7              | 45.3                            | ~3.8                                           |
| 20   | 343.15       | 544.45       | 0.630     | 1200                        | ~0.47                     | 56.4              | 39.5                            | ~3.6                                           |
| 21   | 343.15       | 544.45       | 0.630     | 960                         | ~0.47                     | 45.4              | 31.8                            | ~3.5                                           |
| 22   | 343.15       | 544.45       | 0.630     | 660                         | ~0.47                     | 31.2              | 25.1                            | ~4.1                                           |
| 23   | 343.15       | 544.45       | 0.630     | 600                         | ~0.47                     | 28.4              | 25.8                            | ~3.7                                           |
| 24   | 343.15       | 544.45       | 0.630     | 540                         | ~0.47                     | 25.6              | 21.8                            | ~4.9                                           |

\*Root mean square surface roughness (area size range:  $2\ \mu\text{m} \times 2\ \mu\text{m}$ )
